# Supplementary material for: The Role of Nuclear Factor-Kappa B in Fibrinogen-Induced Inflammatory Responses in Cultured Primary Neurons
Source: MDPI journal article supplement (doi:10.3390/biom12121741), 2022-11-23
Supplement: s1 [file s1]

## Supplementary Materials

### 1. Results and Discussion

#### 1.1. *Fg-induced translocation of NF- $\kappa$ B p65 into nucleus*

We found that the expression of NF $\kappa$ B p65 in the nuclei of neurons treated with 1mg/ml of Fg was greater than that in the nuclei of neurons treated with vehicle (control). The colocalization of NF $\kappa$ B p65 with the nuclear marker 4',6-diamidino-2-phenylindole (DAPI) in neurons treated with 1mg/ml of Fg was also greater than that in neurons treated with vehicle (control). Both the expression of NF $\kappa$ B p65 and the co-localization NF $\kappa$ B p65 and nuclear marker DAPI were significantly reduced by caffeic acid phenethyl ester (CAPE), a function-blocking antibody against ICAM-1, or a function-blocking peptide against PrP<sup>C</sup> in neurons treated with Fg.

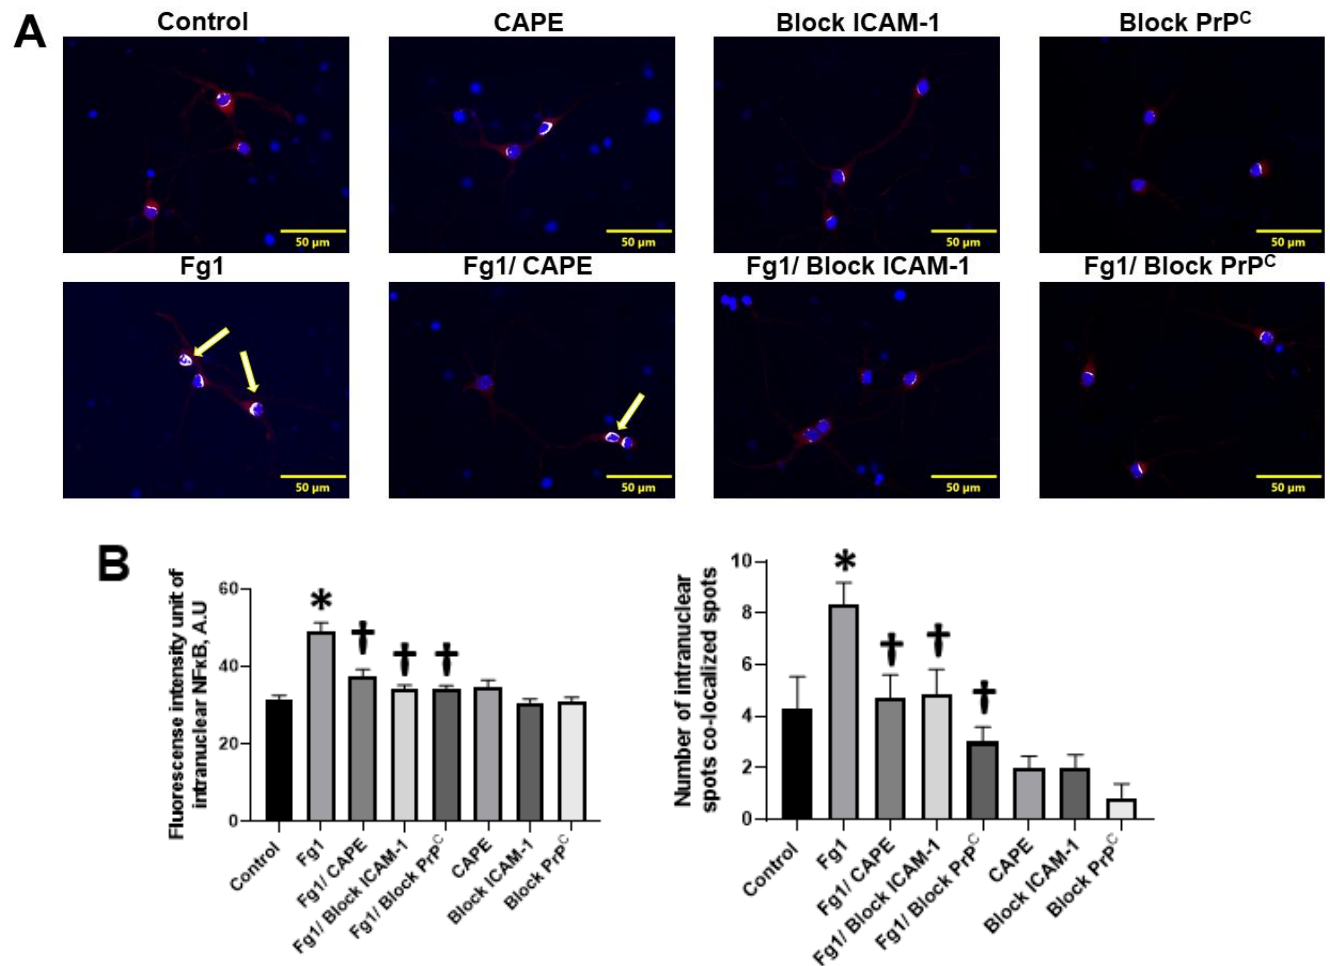

**Figure S1.** The reduction of fibrinogen (Fg)-induced expression of nuclear factor- $\kappa$ B (NF- $\kappa$ B) p65, through the application of an NF- $\kappa$ B antagonist and the prevention of Fg/neurons interactions, and its translocation to neuronal nuclei. Primary mouse brain cortex neurons were treated with phosphate buffered saline (PBS) or with 1 mg/ml of Fg in the presence or absence of caffeic acid phenethyl ester (CAPE), a function-blocking antibody against intercellular adhesion protein-1 (ICAM-1), or a function-

blocking peptide against cellular prion protein (PrP<sup>C</sup>). **(A)** Representative images of the translocation of NF- $\kappa$ B p65 (red) to the nuclei of Fg-treated neurons, defined with a neuronal marker of microtubule-associated protein 2 (MAP2, green). Nuclei of cells are marked with 4',6-diamidino-2-phenylindole (DAPI, blue). Co-localization of NF- $\kappa$ B p65 and DAPI is shown as a white spot (yellow arrows). **(B)** Summaries of fluorescence intensity changes of intranuclear NF- $\kappa$ B staining (left graph) and the number of co-localized NF- $\kappa$ B and DAPI in the nucleus of a neuron (right graph).  $P < 0.05$  for all; \* vs. control; † vs. Fg1;  $n = 3$ .

## 2. Original images for Western blot

The full image of western blot with marked NF $\kappa$ B p65 and  $\beta$ -actin.

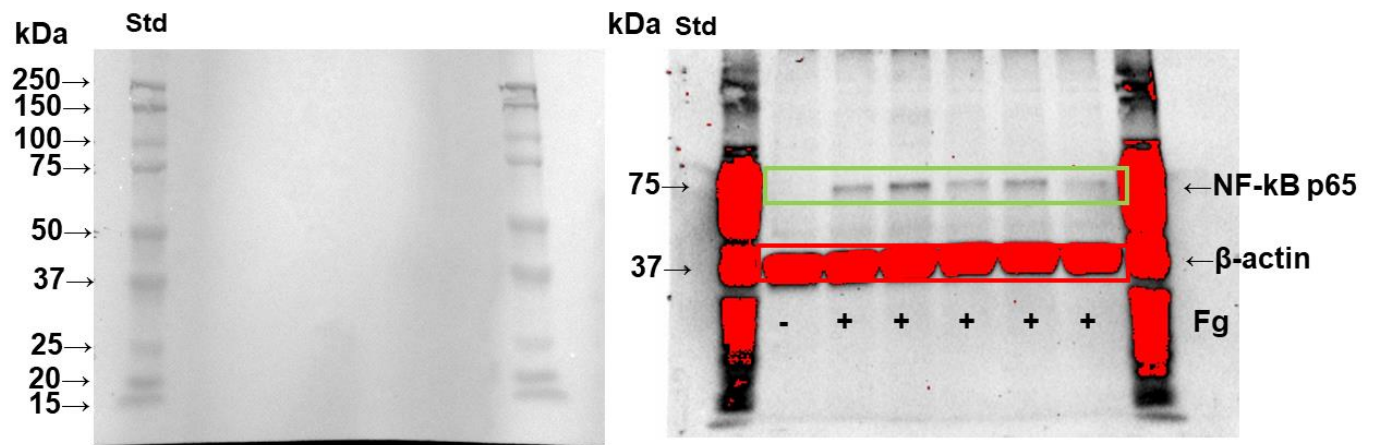

Figure S2. Original western blot image of Figure 2A for NF $\kappa$ B p65.

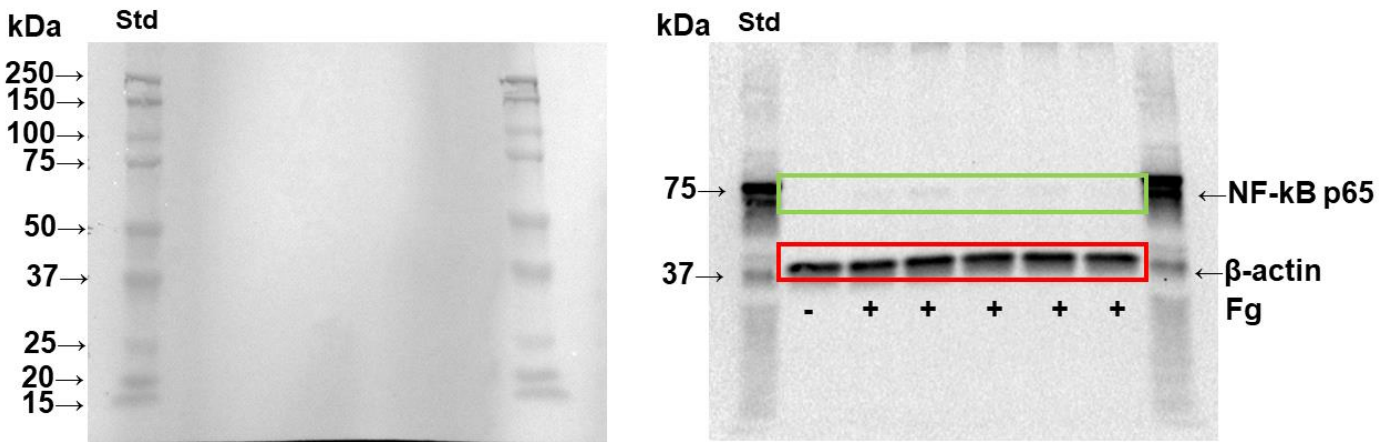

Figure S3. Original western blot image of Figure 2A (longer exposure time for better  $\beta$ -actin detection).

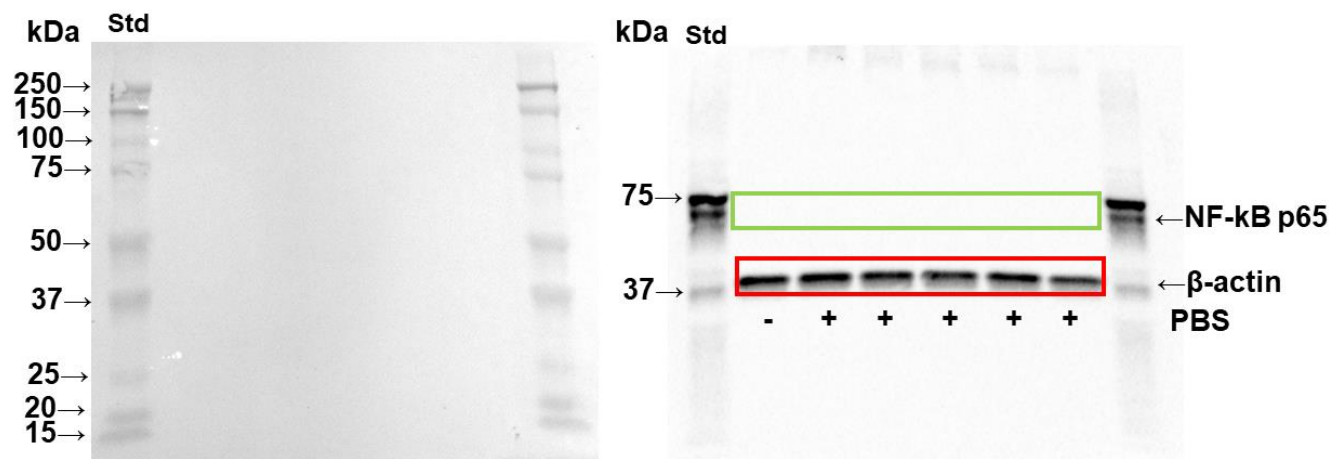

Figure S4. Original Western blot image of Figure 2 inset.

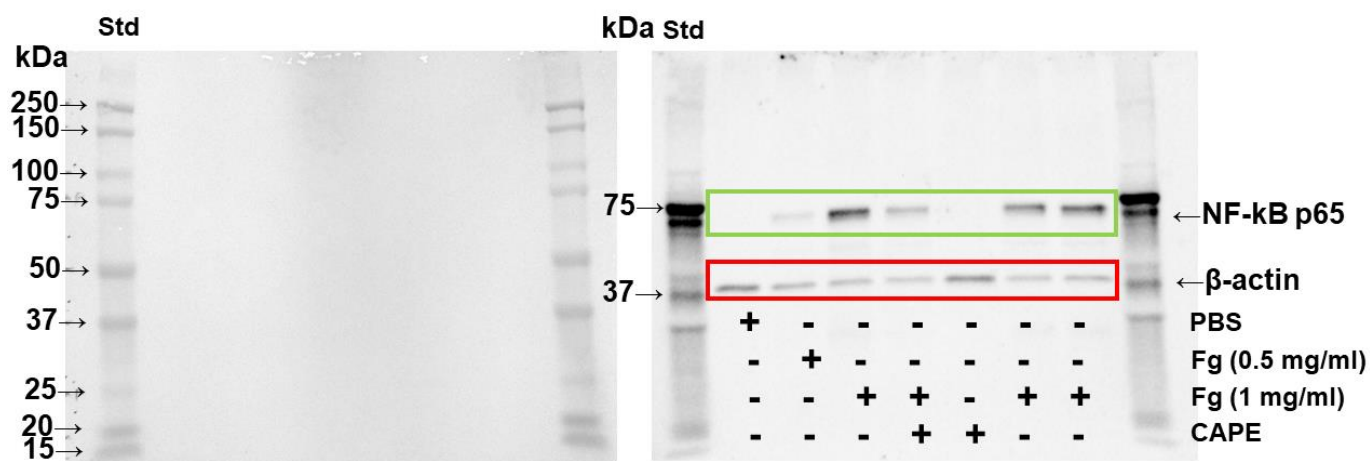

Figure S5. Original Western blot image of Figure 2C.

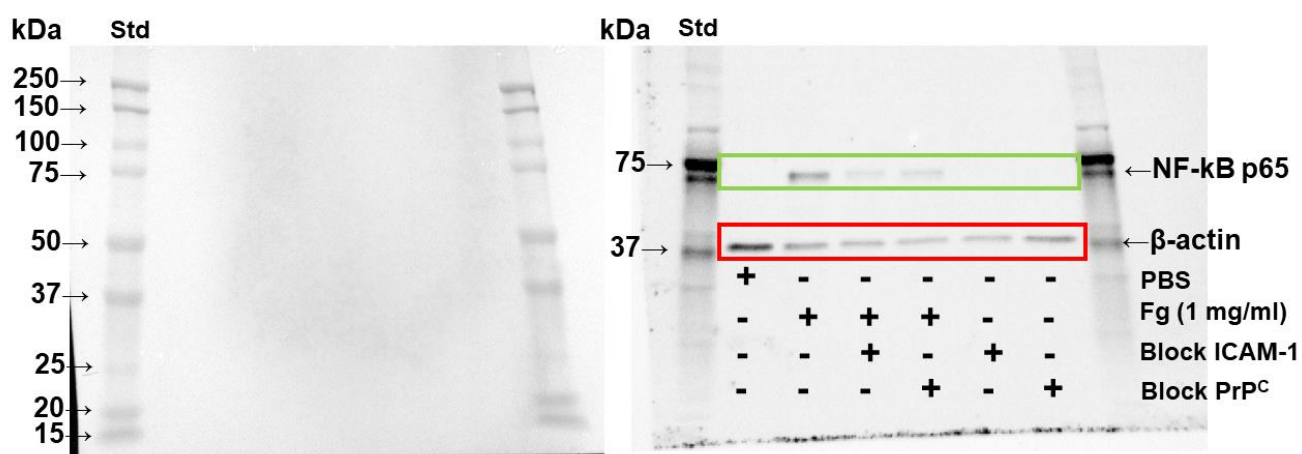

Figure S6. Original Western blot image of Figure 2D.
